# Supplementary material for: Vaccination hesitancy in the antenatal period: a cross-sectional survey
Source: PubMed Central journal article supplement (PMC5930425; doi:10.1186/s12889-018-5389-6), 2018-05-02
Supplement: 12889_2018_5389_MOESM1_ESM.pdf [file 12889_2018_5389_MOESM1_ESM.pdf]

## Vaccine decision journeys

### Survey Instructions

Please answer as many of the questions in the survey as you can.

Please provide the single response for each question or statement that best reflects your opinion or how you feel today. Some questions ask you to rate how much you agree or disagree on a scale from strongly disagree to strongly agree and others ask you rate your response on a scale of 0 to 10. For each question put an **X** in the box that best describes your response to the statement. There are no right or wrong answers.

If you agree to allow the researchers to check your baby's vaccination status at around 6 months of age please don't forget to provide the contact details of your doctor and/or nurse immuniser **ON THE BACK PAGE** after answering the survey questions

**Please answer the questions as they relate to the baby you are pregnant with now**

|    | (Select one option only)                              | Strongly oppose | Generally oppose | Neither support nor oppose | Generally support | Strongly support |
|----|-------------------------------------------------------|-----------------|------------------|----------------------------|-------------------|------------------|
| Q1 | Overall, how do you feel about childhood vaccination? |                 |                  |                            |                   |                  |

Parents who are expecting a baby will make decisions about vaccination.

| Q2 At this time, regarding the decision about vaccinating your baby, would you say you ... |                                                                         |
|--------------------------------------------------------------------------------------------|-------------------------------------------------------------------------|
| Mark <u>one row only</u>                                                                   |                                                                         |
|                                                                                            | haven't begun to think about the choices                                |
|                                                                                            | haven't begun to think about the choices, but am interested in doing so |
|                                                                                            | are considering the options now                                         |
|                                                                                            | are close to selecting an option                                        |
|                                                                                            | have already made a decision but am willing to reconsider               |
|                                                                                            | have already made a decision and am unlikely to change my mind          |

Q2 Stage of decision making©, AM O'Connor 2000

Mark only one box in each row under the response that best reflects how you feel about the statement today

|    |                                                                                       | Strongly Disagree | Moderately Disagree | Slightly Disagree | Slightly Agree | Moderately Agree | Strongly Agree |
|----|---------------------------------------------------------------------------------------|-------------------|---------------------|-------------------|----------------|------------------|----------------|
| Q3 | Because other children are vaccinated, it isn't necessary to have my child vaccinated |                   |                     |                   |                |                  |                |
| Q4 | Most people who are important to me think I should get my child vaccinated            |                   |                     |                   |                |                  |                |
| Q5 | Most people who are important to me would have their child vaccinated                 |                   |                     |                   |                |                  |                |

Please read the following comments some people make when deciding about vaccinating their child. Please show how strongly you agree or disagree with these comments by placing an X in the column that best shows how you feel about deciding about vaccinating your child.

| In making the decision about vaccines for my child |                                                                                                            | Strongly disagree | Disagree | Neither agree nor disagree | Agree | Strongly agree |
|----------------------------------------------------|------------------------------------------------------------------------------------------------------------|-------------------|----------|----------------------------|-------|----------------|
| Q6                                                 | I know which options are available to me                                                                   |                   |          |                            |       |                |
| Q7                                                 | I know the benefits of each option                                                                         |                   |          |                            |       |                |
| Q8                                                 | I know the risks and side effects of each option                                                           |                   |          |                            |       |                |
| Q9                                                 | I am clear about which benefits matter most to me                                                          |                   |          |                            |       |                |
| Q10                                                | I am clear about which risks and side effects matter most to me                                            |                   |          |                            |       |                |
| Q11                                                | I am clear about which is more important to me (the benefits or the risks and side effects)                |                   |          |                            |       |                |
| Q12                                                | I have enough support from others to make a choice                                                         |                   |          |                            |       |                |
| Q13                                                | I am choosing without pressure from others                                                                 |                   |          |                            |       |                |
| Q14                                                | I have enough advice to make a choice                                                                      |                   |          |                            |       |                |
| Q15                                                | I am clear about the best choice for me                                                                    |                   |          |                            |       |                |
| Q16                                                | I feel sure about what to choose                                                                           |                   |          |                            |       |                |
| Q17                                                | The decision is easy for me to make                                                                        |                   |          |                            |       |                |
| Q18                                                | I have given a lot of thought to my decision concerning vaccination for my child                           |                   |          |                            |       |                |
| Q19                                                | The benefits of vaccines outweigh the risks of vaccines                                                    |                   |          |                            |       |                |
| Q20                                                | Access to government family support payments is important in my decisions about fully vaccinating my child |                   |          |                            |       |                |

Q6-Q17 O'Connor AM. *Validation of a decisional conflict scale*. Med Dec Making 1995;15(1):25-30

Mark only one box in each row under the response that best reflects how you feel today

|     |                                                                                        | Very concerned | Somewhat concerned | Not sure | Not too concerned | Not concerned at all |
|-----|----------------------------------------------------------------------------------------|----------------|--------------------|----------|-------------------|----------------------|
| Q21 | How concerned are you that your child might have a serious side effect from a vaccine? |                |                    |          |                   |                      |
| Q22 | How concerned are you that any one of the childhood vaccines might not be safe?        |                |                    |          |                   |                      |
| Q23 | How concerned are you that a vaccine might not prevent the disease?                    |                |                    |          |                   |                      |

Mark only one box in each row under the response that best reflects your experience or intentions

|     |                                                                                                             | Yes | No | Don't know | Not applicable I am having my first baby |
|-----|-------------------------------------------------------------------------------------------------------------|-----|----|------------|------------------------------------------|
| Q24 | Have you ever delayed having a child of yours get a vaccine for reasons other than illness or allergy?      |     |    |            |                                          |
| Q25 | Have you ever decided not to have a child of yours get a vaccine for reasons other than illness or allergy? |     |    |            |                                          |
| Q26 | When you have had your baby, would you want him/her to get all the recommended vaccines?                    |     |    |            |                                          |

Mark only one box in each row under the response that best reflects how you feel today

|     |                                                                                   | Very<br>hesitant | Somewhat<br>hesitant | Not sure | Not too<br>hesitant | Not at all<br>hesitant |
|-----|-----------------------------------------------------------------------------------|------------------|----------------------|----------|---------------------|------------------------|
| Q27 | Overall, how hesitant about childhood vaccines would you consider yourself to be? |                  |                      |          |                     |                        |

For the next 3 questions indicate your answer on the scale from 0 to 10 using the guide provided.

|     |                                                                                                                                                                 | 0 | 1 | 2 | 3 | 4 | 5 | 6 | 7 | 8 | 9 | 10 |
|-----|-----------------------------------------------------------------------------------------------------------------------------------------------------------------|---|---|---|---|---|---|---|---|---|---|----|
| Q28 | How sure are you that following the recommended vaccine schedule is a good idea for your child?<br>(From 0 = not at all sure to 10 = completely sure)           |   |   |   |   |   |   |   |   |   |   |    |
| Q29 | All things considered, how much do you trust your child's doctor?<br>(From 0= Do not trust at all to 10= completely trust)                                      |   |   |   |   |   |   |   |   |   |   |    |
| Q30 | If children in Australia are not vaccinated, how likely do you think they are to get a disease that vaccines prevent?<br>(0= not at all likely, 10=very likely) |   |   |   |   |   |   |   |   |   |   |    |

| Q31 Which of the following statements best applies to you today?<br>Mark <u>one row only</u> |                                                                                                                        |
|----------------------------------------------------------------------------------------------|------------------------------------------------------------------------------------------------------------------------|
|                                                                                              | I will allow my baby to have all of their recommended vaccines and have NO concerns about the safety of those vaccines |
|                                                                                              | I will allow my baby to have all of their recommended vaccines and have A FEW MINOR concerns about their safety        |
|                                                                                              | I will allow my baby to have all of their recommended vaccines but have A LOT OF concerns about their safety           |
|                                                                                              | I will allow my baby to have some vaccines on time but there are some I prefer to delay or not have at all             |
|                                                                                              | I will not allow my baby to have any vaccines                                                                          |
|                                                                                              | I am unsure about vaccinating my baby                                                                                  |

Lastly, we'd like to collect some information about you and your baby:

Q32 What is today's date? DD / MM / YYYY

Q33 What date is your baby due to be born? DD / MM / YYYY

Q34 Will this baby be your first child?  Yes  No

Q35 If this is not your first child, how many other babies have you ever given birth to? \_\_\_\_\_ (number)

Q36 Are you planning to have or already had a vaccination against influenza (the flu) during this pregnancy?  Yes  No

Q37 Are you planning to have or already had a vaccination against whooping cough (pertussis) during this pregnancy?  Yes  No

For the following questions, place an X in the box that best describes you (Mark just one box only please)

|     |                                       |             |         |           |       |                   |
|-----|---------------------------------------|-------------|---------|-----------|-------|-------------------|
|     |                                       | In hospital | At home | Undecided | Other | Prefer not to say |
| Q38 | Where are you planning to give birth? |             |         |           |       |                   |

|     |                                          |             |             |             |             |             |           |                   |
|-----|------------------------------------------|-------------|-------------|-------------|-------------|-------------|-----------|-------------------|
|     |                                          | 18-24 years | 25-29 years | 30-34 years | 35-39 years | 40-44 years | 45+ years | Prefer not to say |
| Q39 | What was your age on your last birthday? |             |             |             |             |             |           |                   |

|     |                                                                             |                       |                       |                       |                      |                 |                      |                   |
|-----|-----------------------------------------------------------------------------|-----------------------|-----------------------|-----------------------|----------------------|-----------------|----------------------|-------------------|
|     |                                                                             | Year 12 or equivalent | Year 11 or equivalent | Year 10 or equivalent | Year 9 or equivalent | Year 8 or below | Did not go to school | Prefer not to say |
| Q40 | What is the highest year of primary or secondary school you have completed? |                       |                       |                       |                      |                 |                      |                   |

|     |                                                                                   |                                         |                          |                                            |    |
|-----|-----------------------------------------------------------------------------------|-----------------------------------------|--------------------------|--------------------------------------------|----|
|     |                                                                                   | Yes, trade certificate / apprenticeship | Yes, other qualification | No, still studying for first qualification | No |
| Q41 | Have you completed any educational qualification (including a trade certificate)? |                                         |                          |                                            |    |
|     |                                                                                   | Please answer question Q42 below        |                          | Thank you for completing the survey        |    |

|     |                                                                                                       |                                |                                       |               |                 |                             |                     |                   |            |
|-----|-------------------------------------------------------------------------------------------------------|--------------------------------|---------------------------------------|---------------|-----------------|-----------------------------|---------------------|-------------------|------------|
|     |                                                                                                       | Doctorate (PhD, EdD, LL.D etc) | Professional fellowship qualification | Master degree | Bachelor degree | Associate Degree or diploma | Cert III or Cert IV | Cert II or Cert I | Trade Cert |
| Q42 | If you answered 'Yes' to Q41, what is the level of the highest qualification that you have completed? |                                |                                       |               |                 |                             |                     |                   |            |

☺ **THANK YOU FOR COMPLETING THE SURVEY** ☺

**If you agree to allow the researchers to check your baby's vaccination status at around 6 months of age please don't forget to provide the contact details of your doctor and/or nurse immuniser**

**ON THE NEXT PAGE**

## Consent for follow-up of vaccination status

If you consent to allowing the researchers to check your baby's vaccination records at 6 months of age please provide the following information and sign below:

|                                                                                                    |  |
|----------------------------------------------------------------------------------------------------|--|
| Name of hospital where baby is planned to be delivered or name of midwife if home delivery planned |  |
| Name of medical practice or community health centre                                                |  |
| My doctor's/immunisation nurse's name                                                              |  |
| My doctor's/immunisation nurse's phone number                                                      |  |
| My doctor's/immunisation nurse's address                                                           |  |
| My home or mobile phone number                                                                     |  |

I, \_\_\_\_\_ <first name \_\_\_\_\_, \_\_\_\_\_ family name> \_\_\_\_\_, of,  
 \_\_\_\_\_ < home address) \_\_\_\_\_,

provide consent for Paul Corben of the North Coast Public Health Unit to access:

- my child's birth records held by the hospital and/or midwife named above, and
- my child's vaccination records held by my doctor/nurse named above, and
- my child's vaccination records on the Australian Childhood Immunisation Register.

Signature: \_\_\_\_\_ Date: \_\_\_\_\_

Witness name: \_\_\_\_\_ Witness signature: \_\_\_\_\_

### Interest in being interviewed about vaccination decisions

If you would like to participate in **the interviews** (one before your baby is born and the second interview when your baby is about 6 months old) please provide your contact details below:

|                        |  |
|------------------------|--|
| Your home telephone :  |  |
| Your mobile telephone: |  |
| Your email address:    |  |
| Your home address      |  |

I ..... (print name)

**agree to be invited to take part in interviews** about making decisions about vaccination with my partner or other support person. I understand that **if we are interviewed we will be provided a separate information and consent form prior to the first interview.**
